# Supplementary material
Source: PubMed Central journal article supplement (PMC3812235)
Supplement: NIHMS468279-supplement-Suppl-Data-FigsandTable.pdf [file NIHMS468279-supplement-Suppl-Data-FigsandTable.pdf]

Supplementary Fig. 1

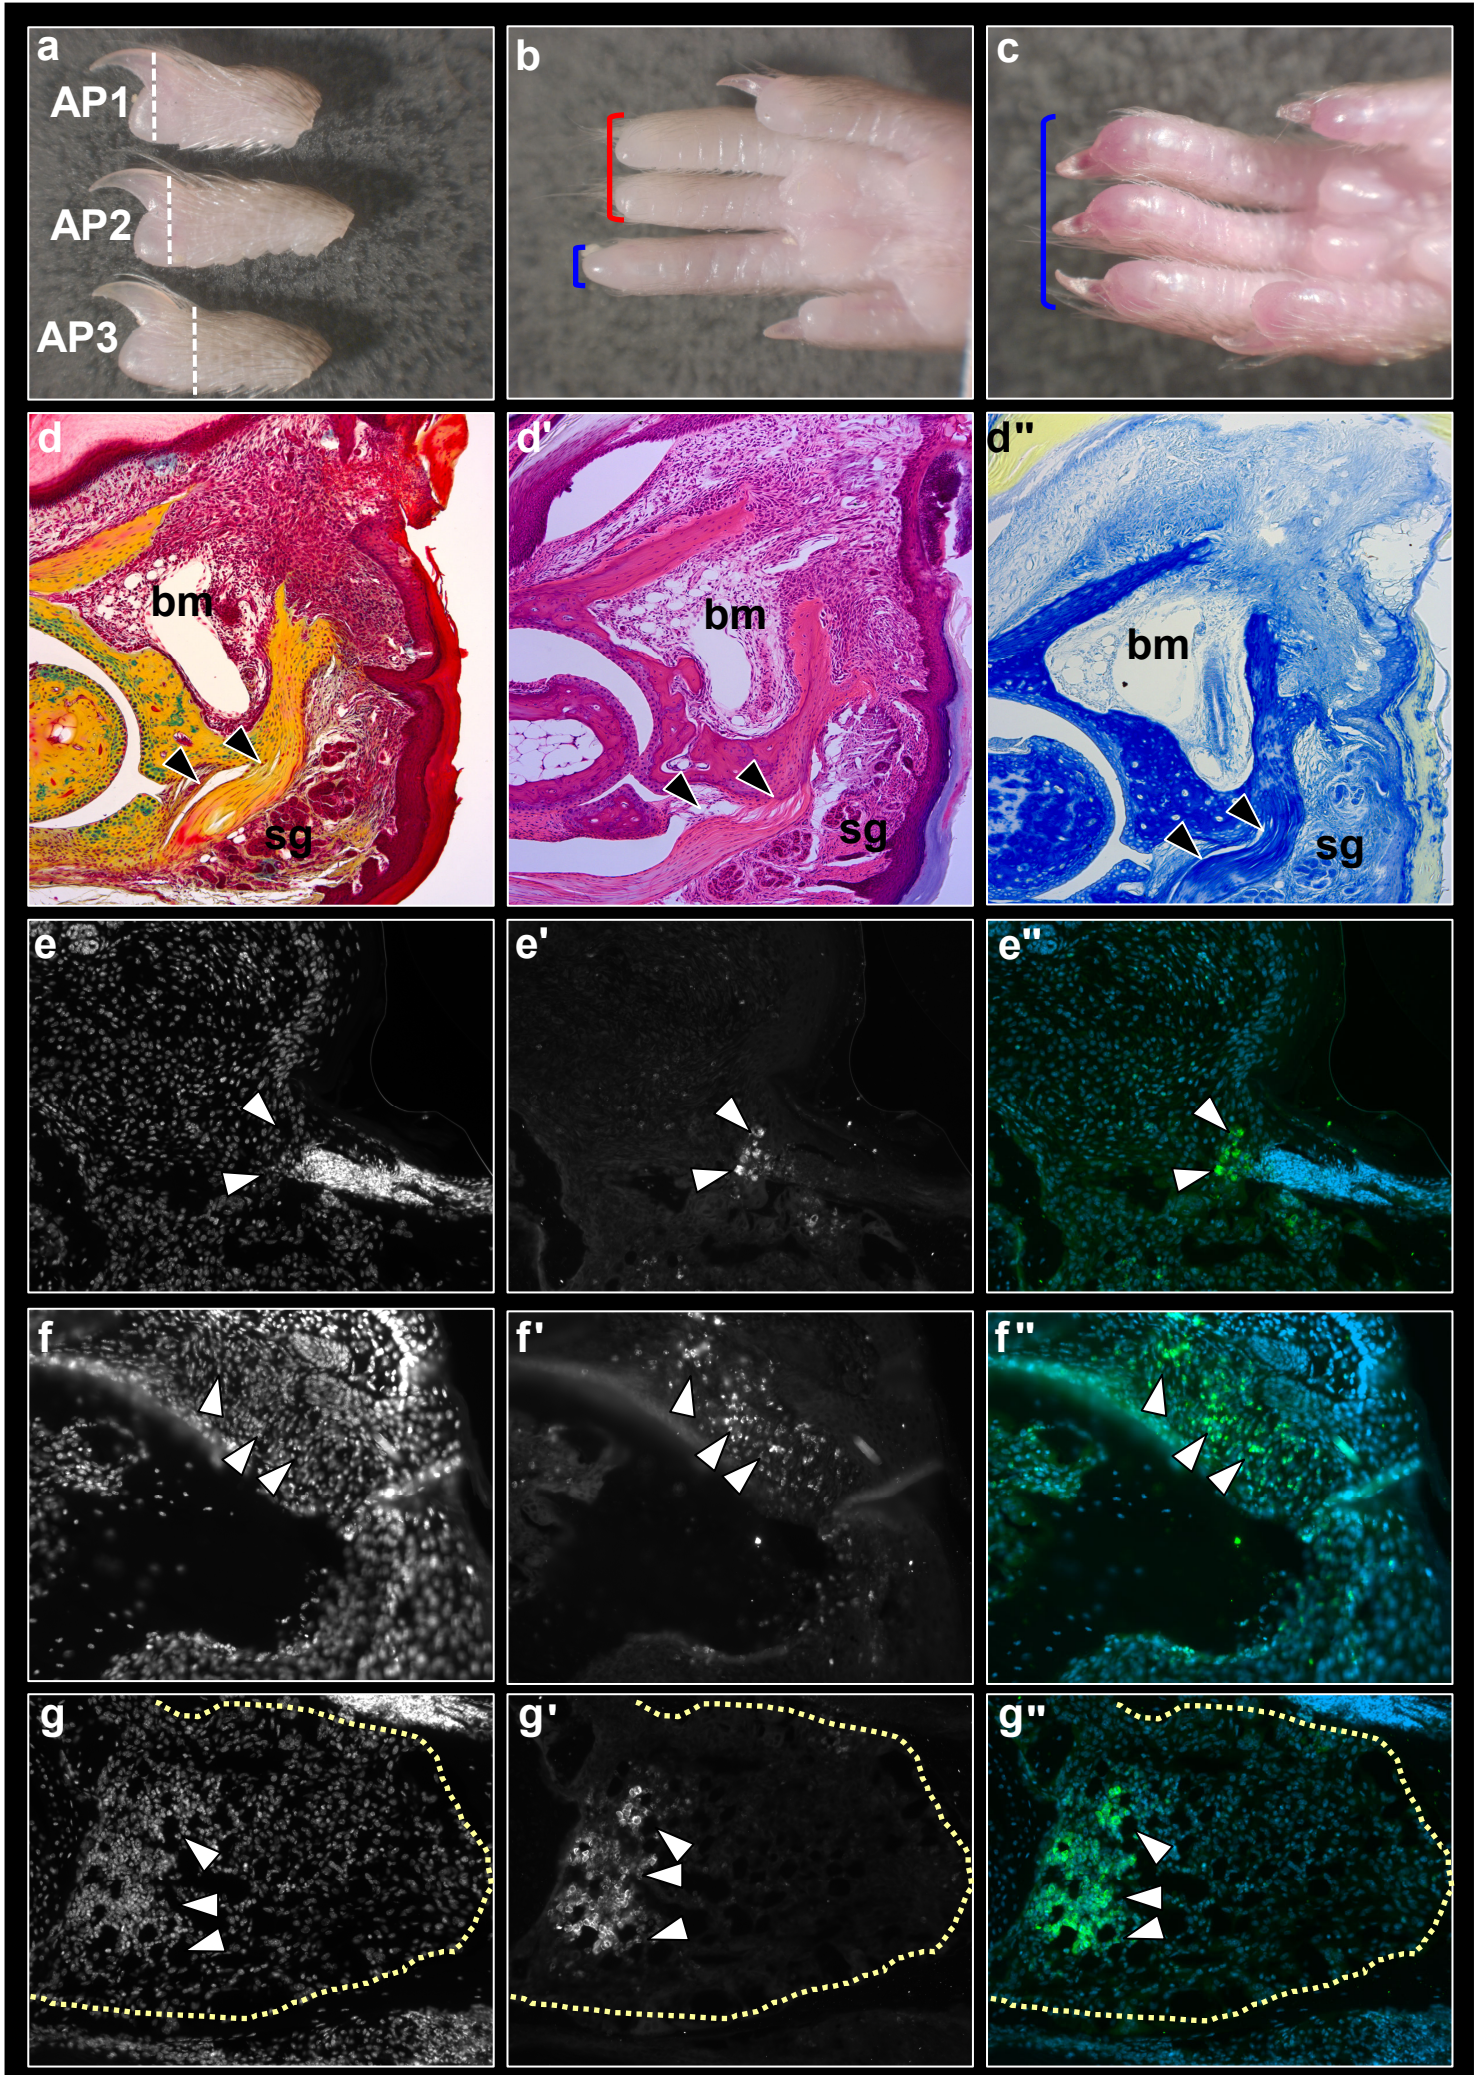

### Supplementary Figure 1

Regeneration of the mouse digit tip following distal amputations. Three amputation planes (AP) were examined along the distal digit (**a**), removing the distal one third (AP1), half (AP2) or two thirds to the entire distal digit (AP3). Partial to complete regrowth was observed in distal planes only (AP1/2). Regrowth of the distal digit after 70 days following amputations through plane 1 or 2 (**b**, **c**, blue bracket) but not through plane 3 (**b**, red bracket). Amputation of the distal digit following 10 days showing a histological undifferentiated zone at the distal digit apex. Pentachrome staining shows collagen and bone in yellow and green, epidermis in red, and dermis/mesenchyme in purple (**d**). Hematoxylin and eosin staining showing mesenchyme at the digit apex (**d'**). Aniline blue staining shows bone in dark blue and connective tissue/mesenchyme in light blue (**d''**). Black arrowheads point to ventral tendon (**d-d''**). A single pulse of BrdU after 7 days, shows local proliferations in the hair follicle (**e-e''**, white arrowheads), nail organ (**f-f''**, white arrowheads) and bone marrow (**g-g''**, white arrowheads). Dashed line outlines the marrow cavity within the distal digit (**g-g''**). bm, bone marrow; sg, sweat glands.



Supplementary Fig. 2

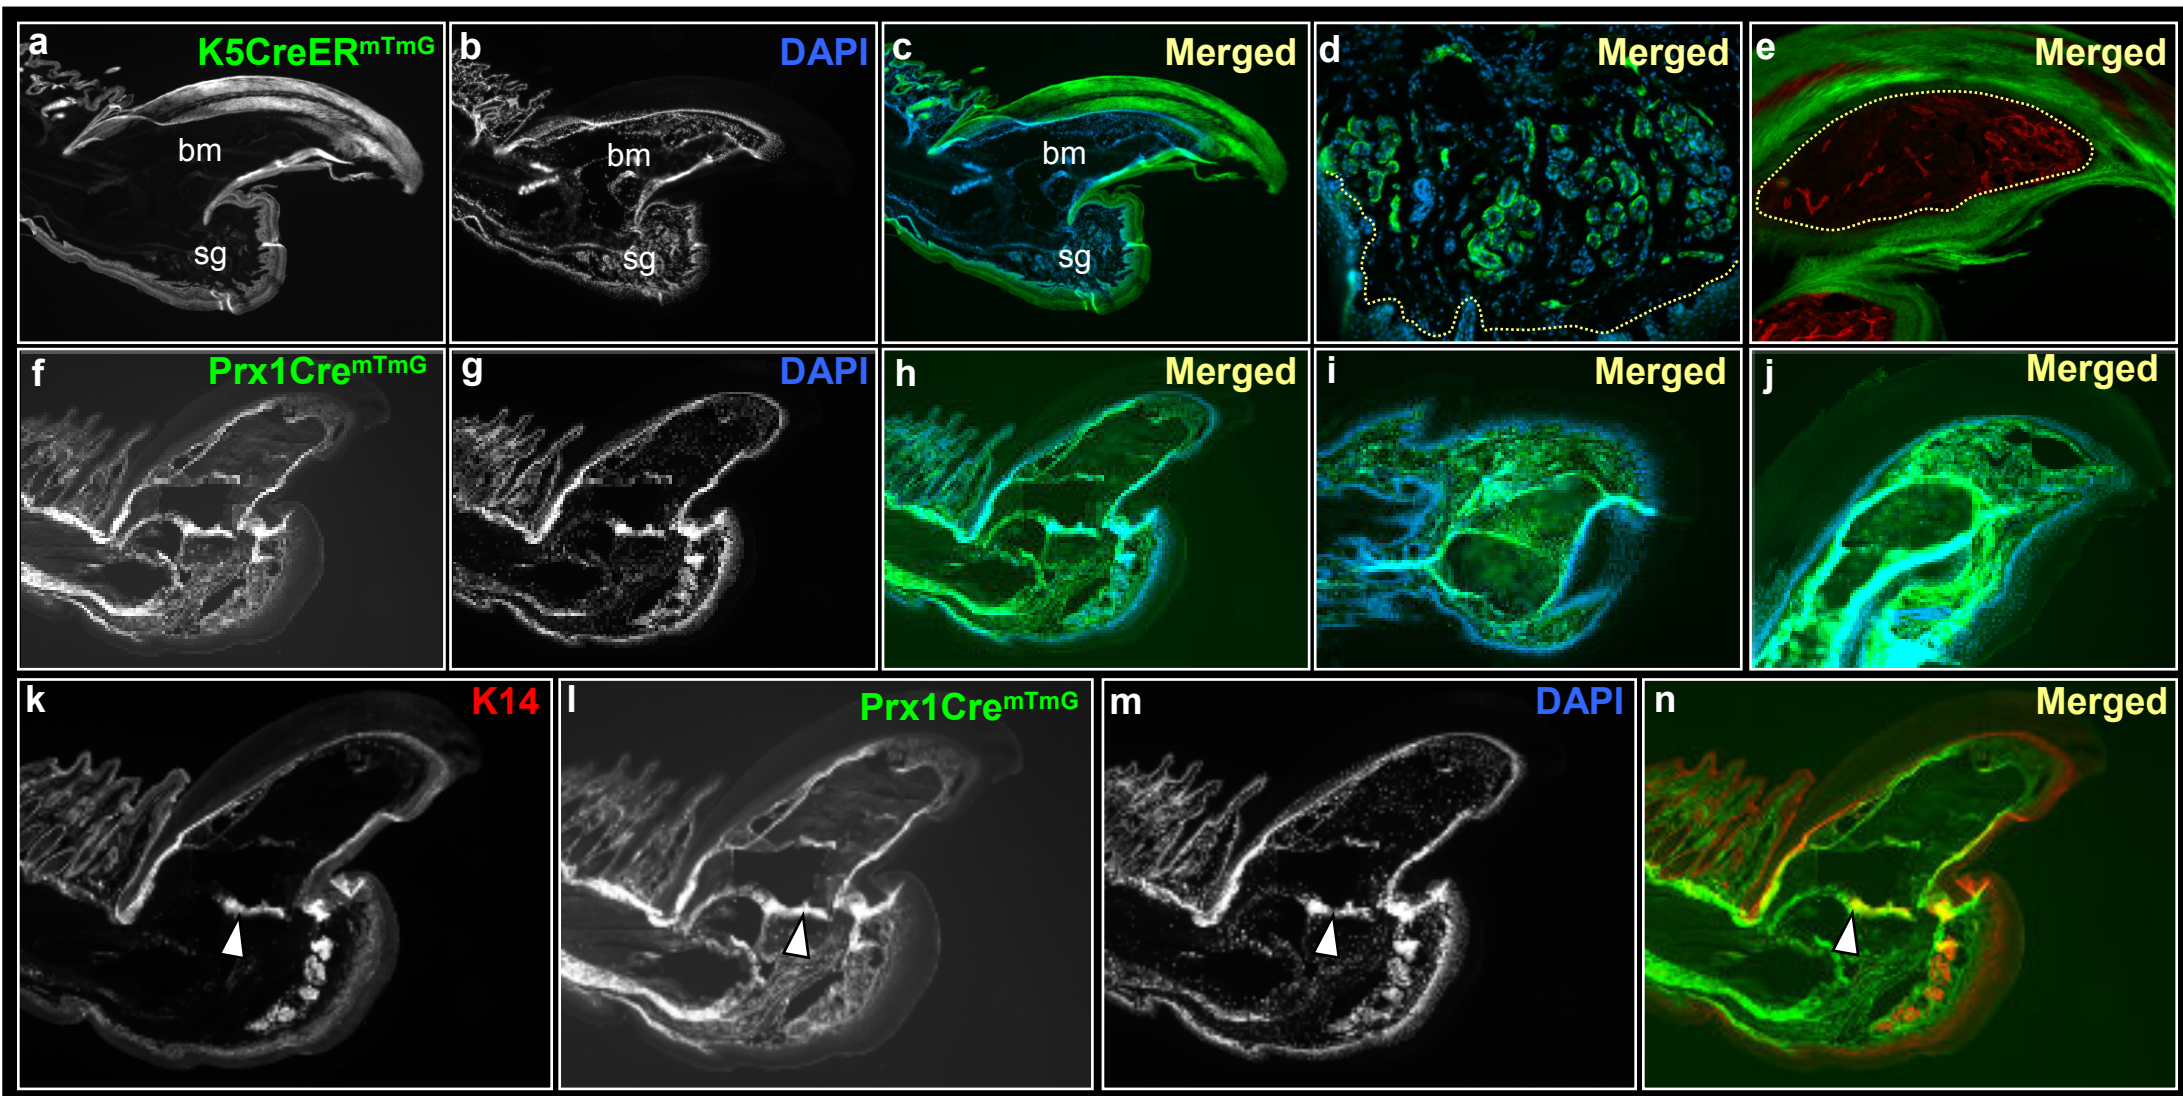

### Supplementary Figure 2

Germ layer restriction of ectoderm and mesoderm during digit tip regeneration. Sections through a distal digit of K5CreER<sup>mTmG</sup> (**a-e**) and Prx1Cre<sup>mTmG</sup> (**f-n**) transgenic mice, following three months post-amputation. Ectoderm contributes to epidermis, nail and sweat glands and fails to contribute to mesoderm tissues (**a-e**). Dashed line outlines the border between epidermis/dermis (**d**) and nail plate/matrix (**e**). Lineage tracing of Prx1-expressing limb mesenchyme shows restriction of GFP expression to bone, tendon and mesenchyme, with no contribution to ectoderm derivatives (**f-j**). In regenerated digits from Prx1Cre<sup>mTmG</sup>, Keratin 14 (K14) expression is mutually exclusive from GFP expression (**k-n**). Staining of K14 within the bone (**k-n**, white arrowhead) is an outcome of tissue artifact and is not seen in high magnification images of same or other tissue sites. bm, bone marrow; sg, sweat glands.



Supplementary Fig. 3

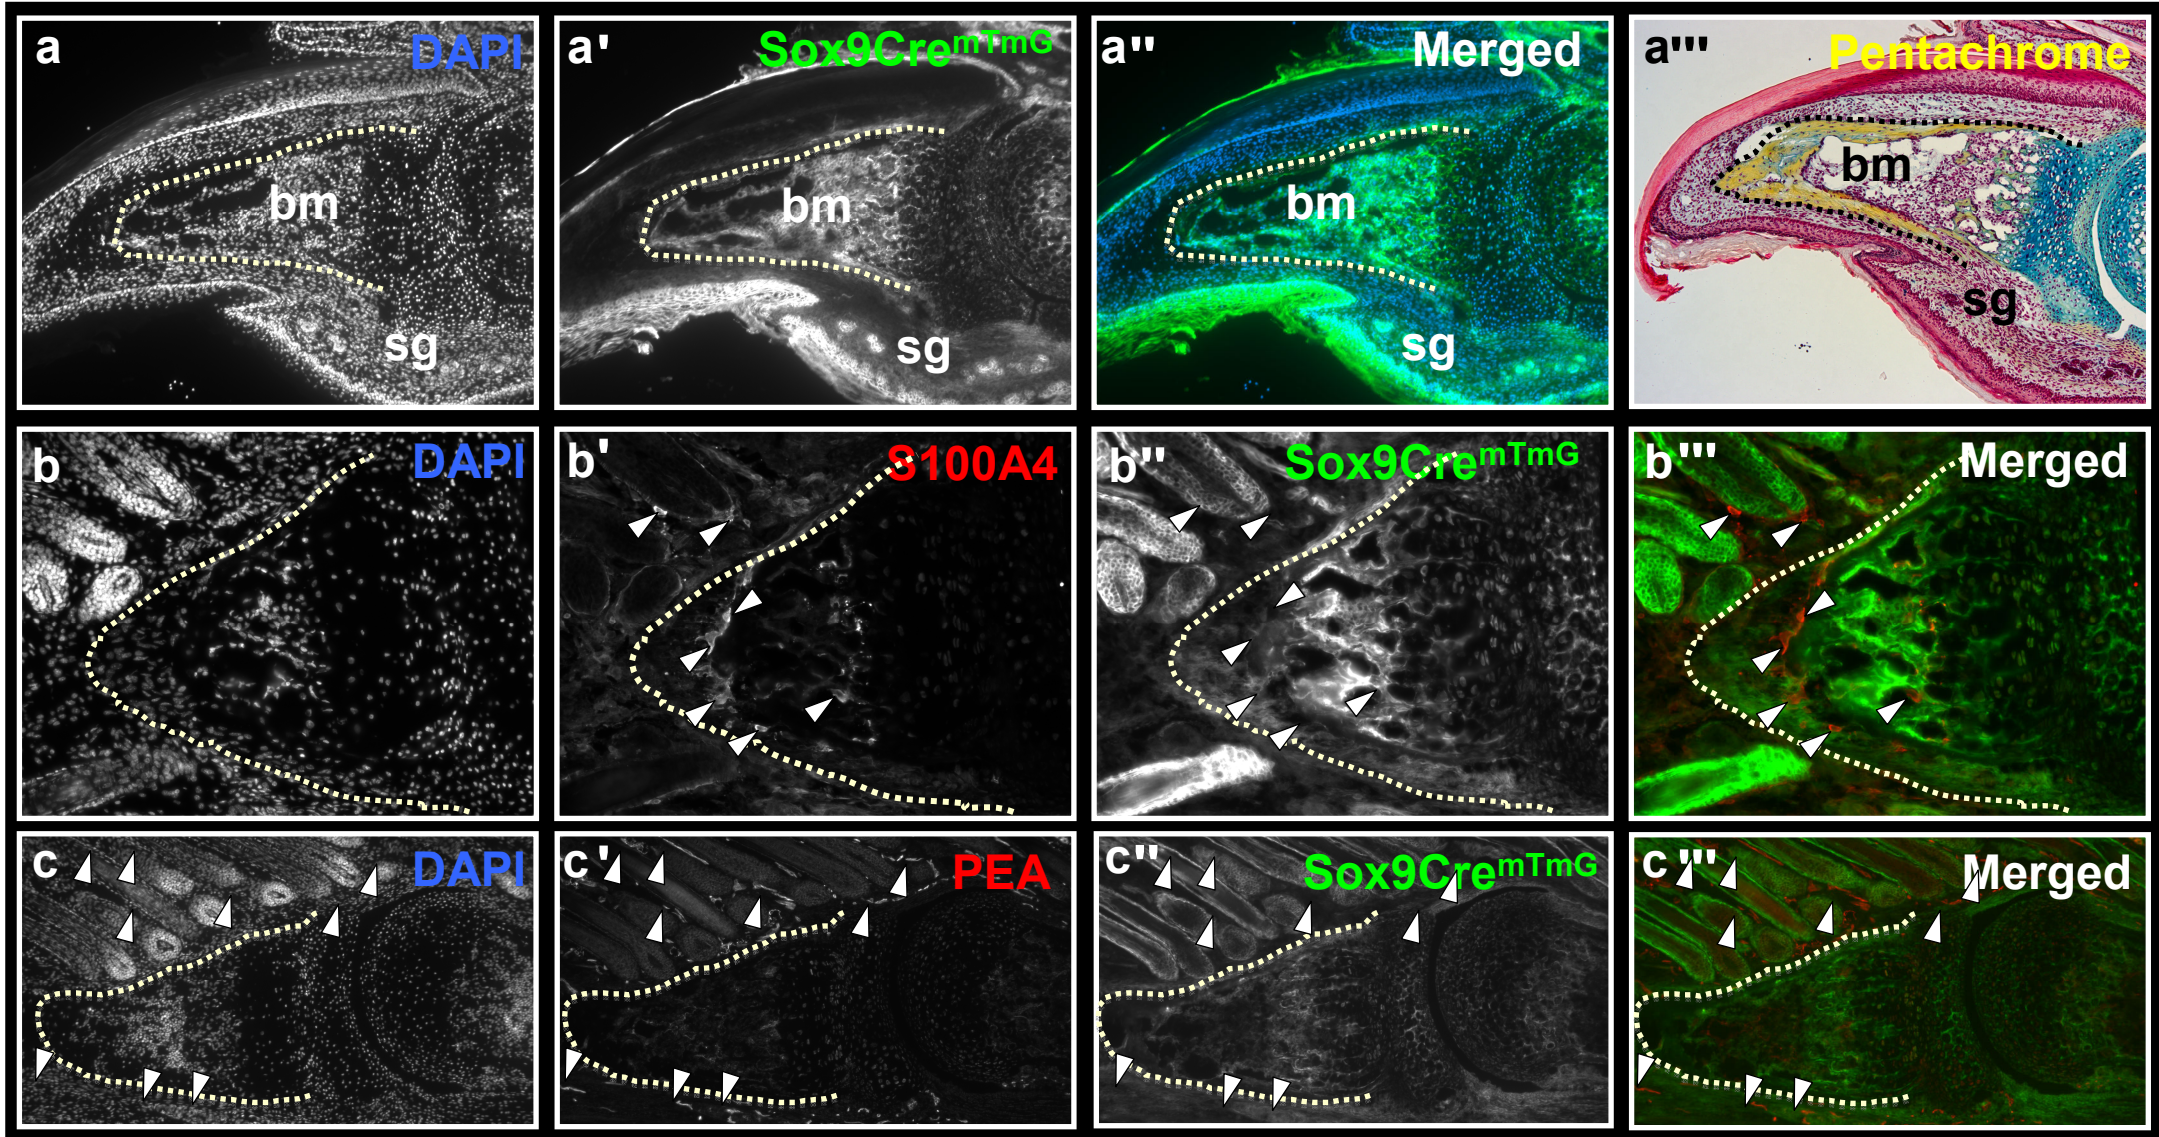

### Supplementary Figure 3

Lineage restriction of osteoblasts to the distal digit bone. Sections through a regenerated distal digit from Sox9Cre<sup>mTmG</sup> mice. Within the mesoderm, GFP expression is restricted to the distal digit bone (**a-a''**). Pentachrome staining of the same section as in **a''** shows the regenerated reticular bone of the distal digit stained in yellow (**a'''**). High magnification images of the distal digit from Sox9Cre<sup>mTmG</sup> mice (**b-c'''**). GFP expression does not co-localize with the fibroblast marker S100A4 (**b-b'''**, white arrowheads) or the endothelial marker PEA (**c-c'''**, white arrowheads). Dashed lines outline the distal digit bone. bm, bone marrow; sg, sweat glands.



Supplementary Fig. 4

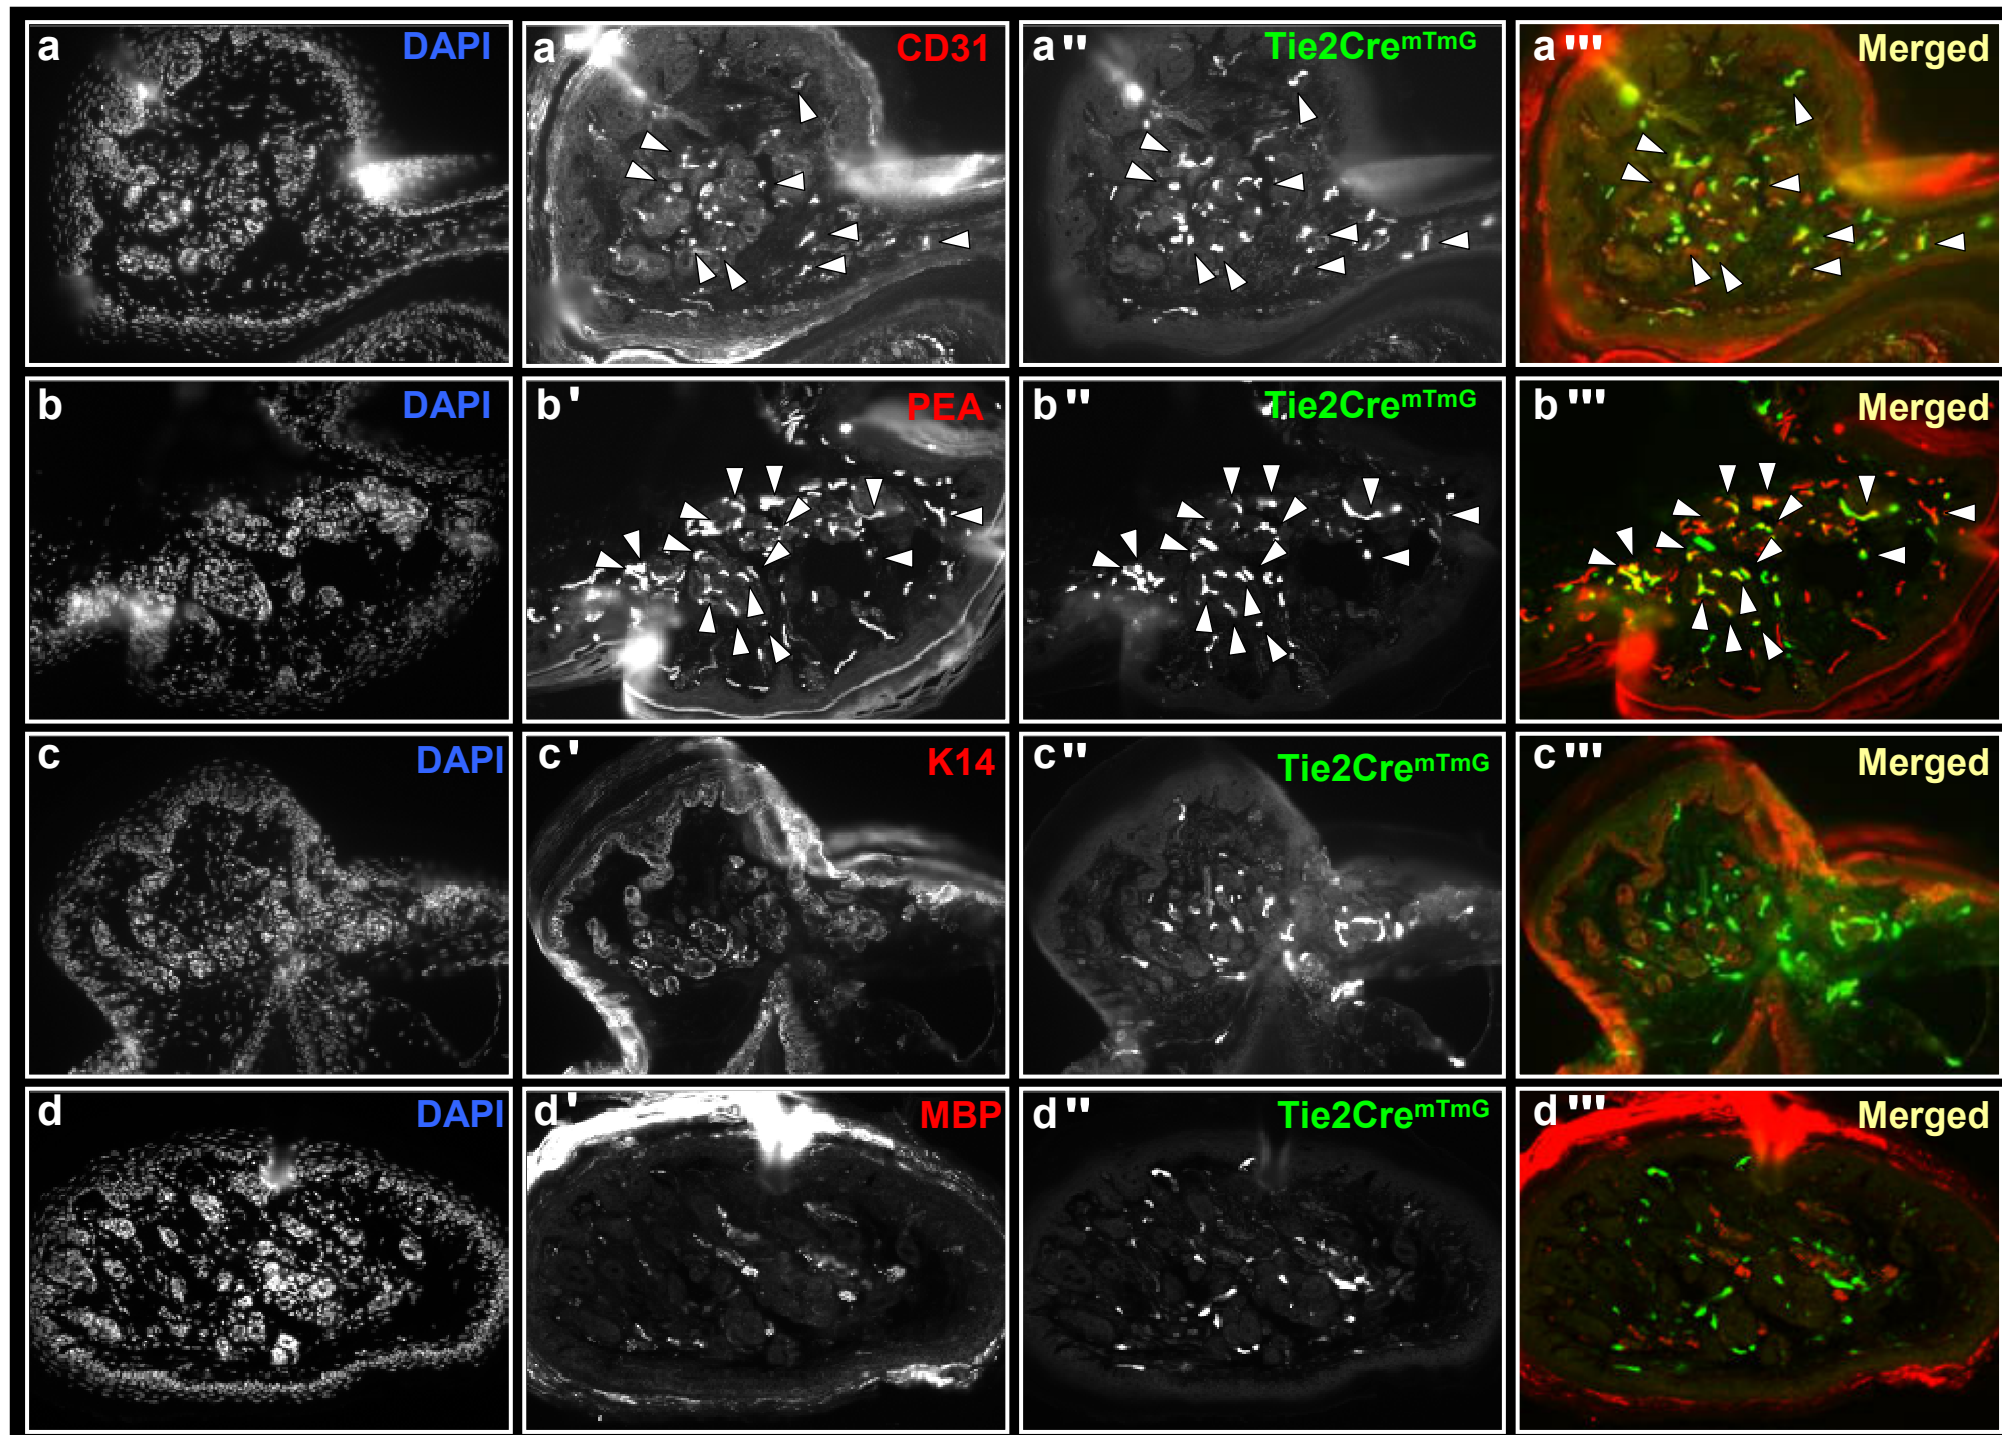

#### **Supplementary Figure 4**

Lineage restriction of endothelium to blood vessels within the regenerated digit. Co-localization of Tie2Cre with the endothelial markers CD31 (**a-a''**, white arrowheads) and PEA (**b-b''**, white arrowheads), but not keratin 14 (K5, **c-c''**) or myelin basic protein (MBP, **d-d''**).



Supplementary Fig. 5

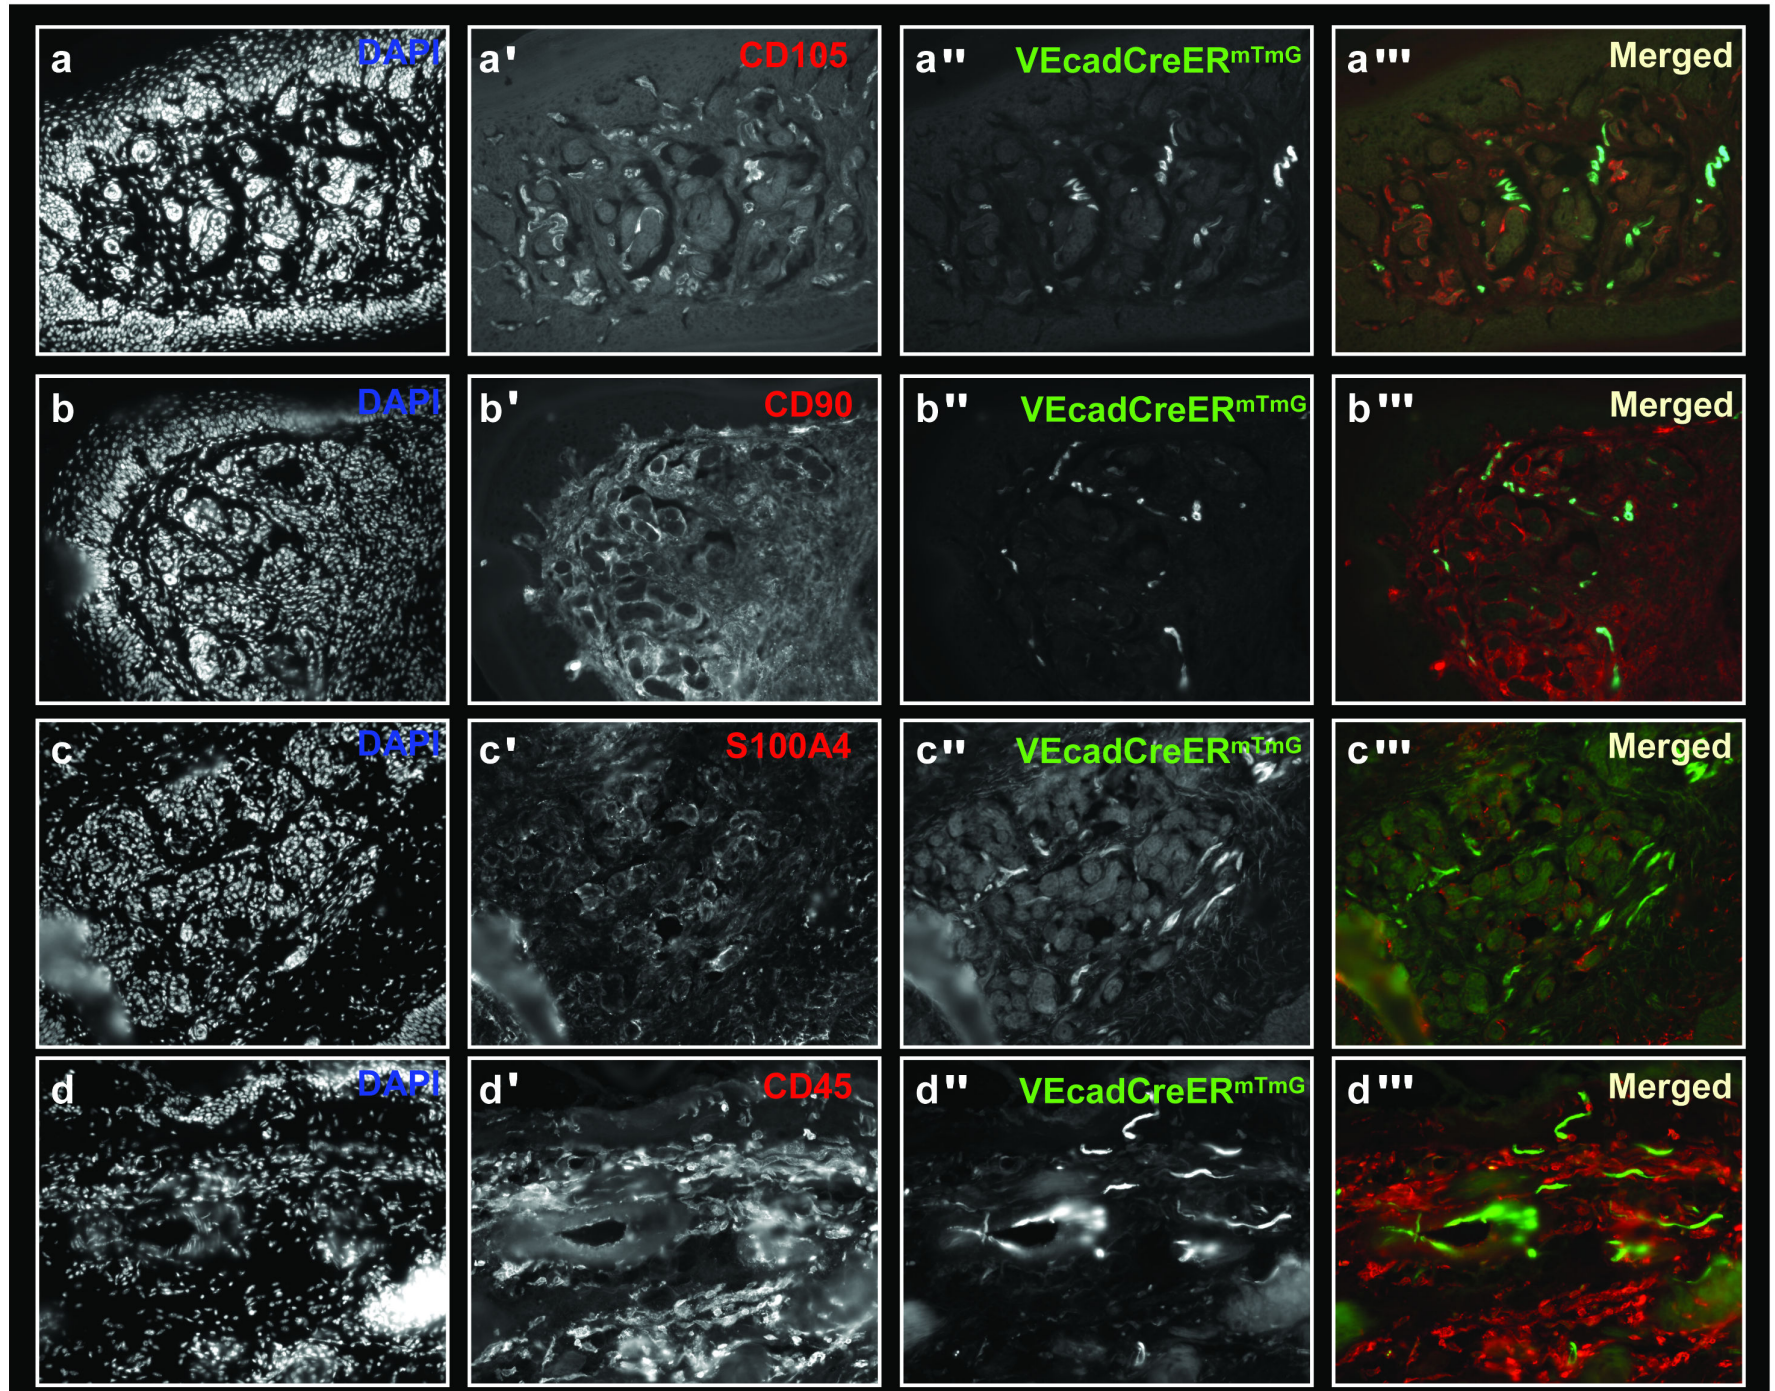

### **Supplementary Figure 5**

Lineage restriction of endothelium to blood vessels within the regenerated digit. GFP positive cells from VEcadCreER<sup>mTmG</sup> regenerated distal digit do not co-localize with fibroblast markers CD105 (**a-a''**), CD90 (**b-b''**), S100A4 (**c-c''**) or the hematopoietic marker CD45 (**d-d''**).



Supplementary Fig. 6

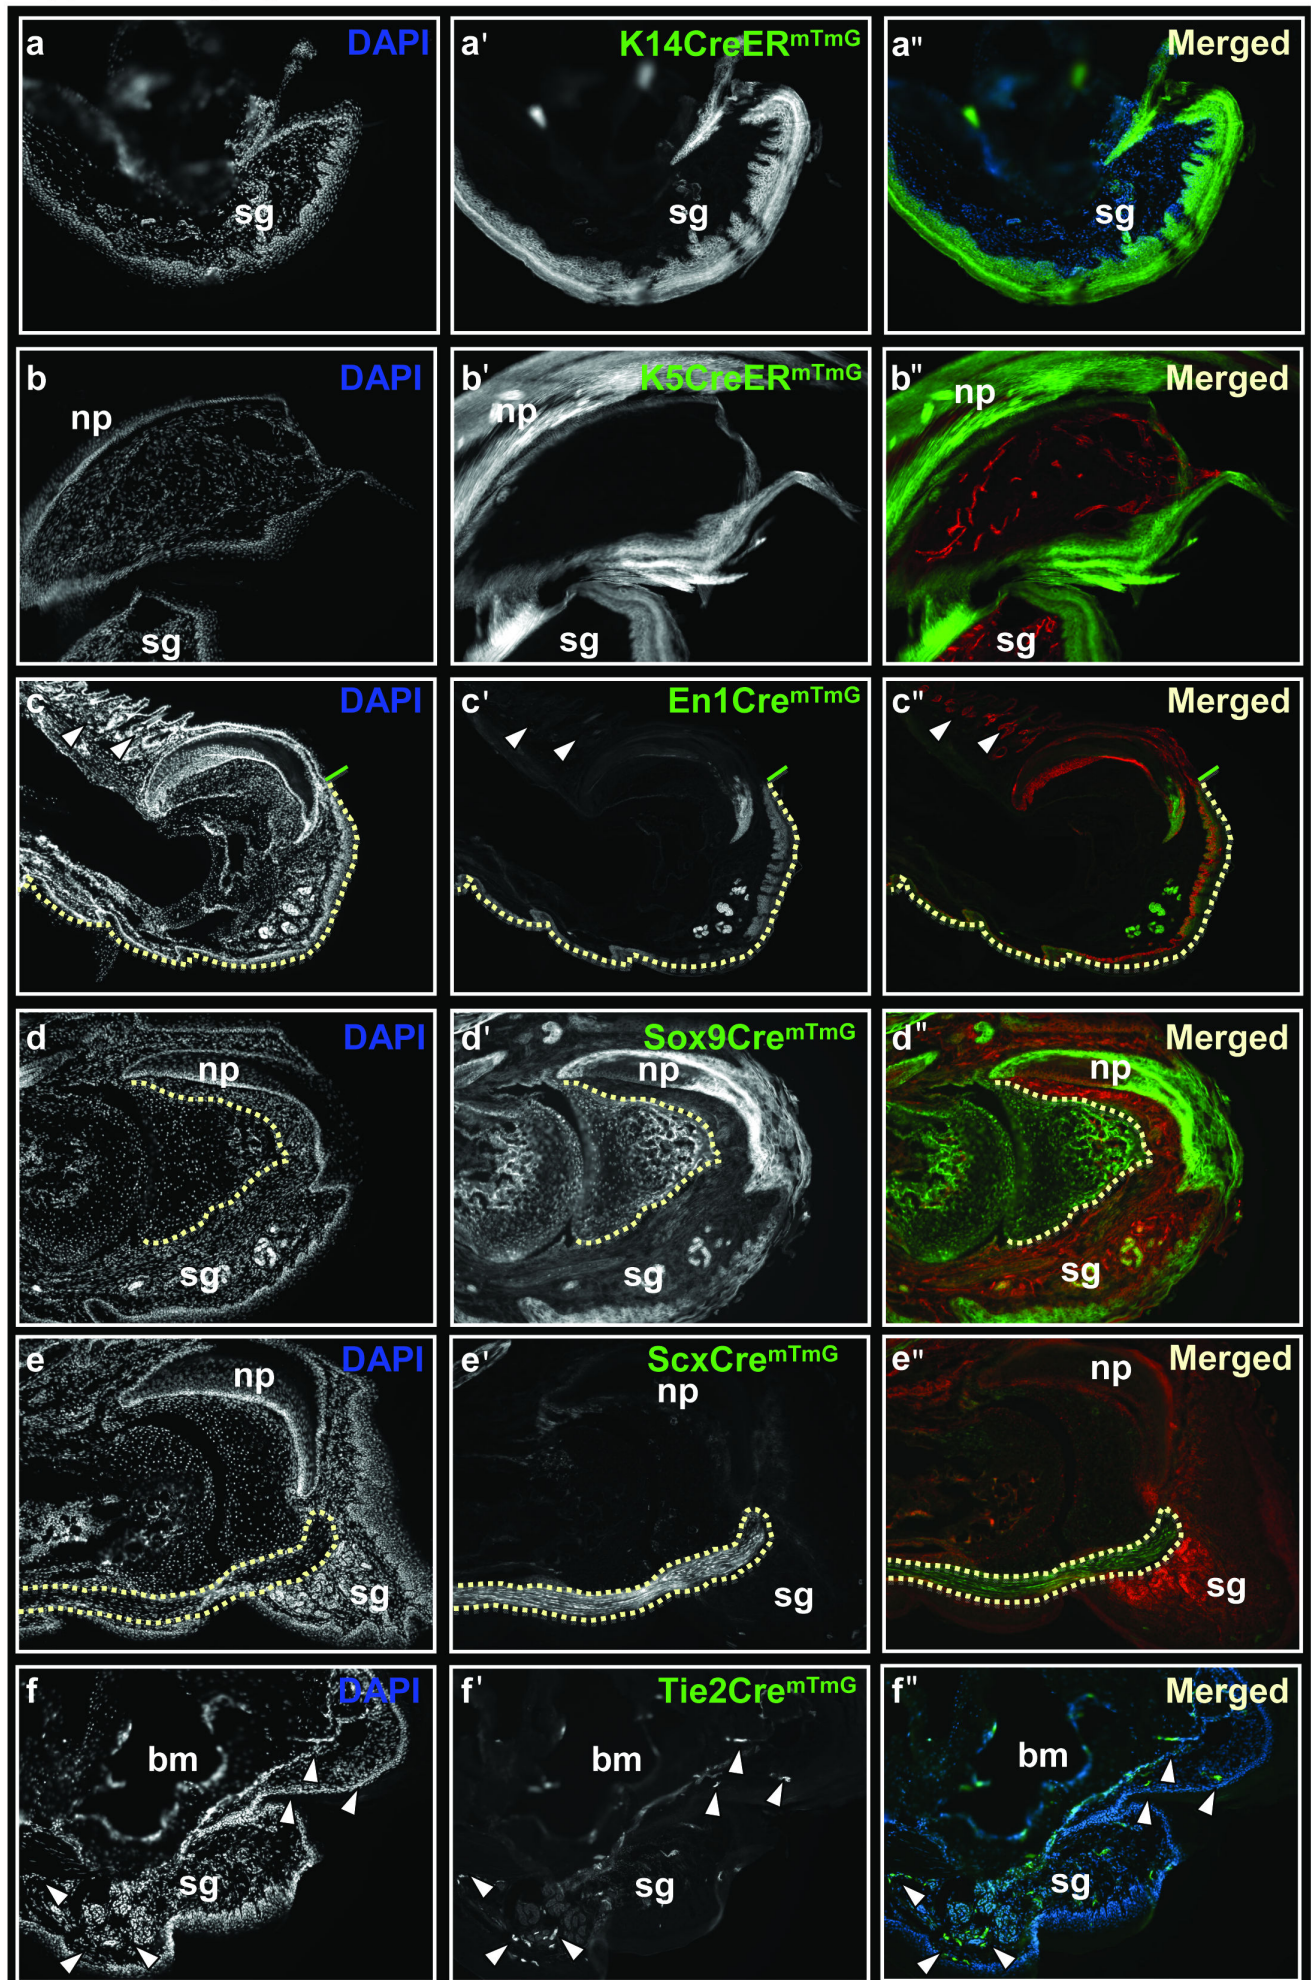

### Supplementary Figure 6

Lineage restriction of stem/progenitors at 10 days post amputation of the distal digit. Digits from K14CreER<sup>mTmG</sup> (**a-a''**), K5CreER<sup>mTmG</sup> (**b-b''**) and En1Cre<sup>mTmG</sup> (**c-c''**) mice show GFP expression is restricted to epidermis (**a-a''**), nail plate (**b-b''**) and ventral sweat glands (**c-c''**). In En1Cre<sup>mTmG</sup> mice, GFP expression is restricted to ventral epidermis (white dashed line) but not dorsal epidermis or associated hair follicles (white arrowheads). Merged image showing co-localization of GFP (green) and keratin 14 protein (red) expressions in ventral ectoderm (**c''**, white dashed line). In Sox9Cre<sup>mTmG</sup> mice, GFP expression within the mesoderm is restricted to the distal digit bone (**d-d''**, outlined by a dashed white line). In ScxCre<sup>mTmG</sup> mice, GFP expression is apparent in the ventral tendons (**e-e''**, outlined by a dashed white line). In Tie2Cre<sup>mTmG</sup> mice, GFP expression is apparent in blood vessels surrounding the ventral sweat glands and beneath the nail plate (**f-f''**, white arrowheads). bm, bone marrow; np, nail plate; sg, sweat glands.

Supplementary Fig. 7

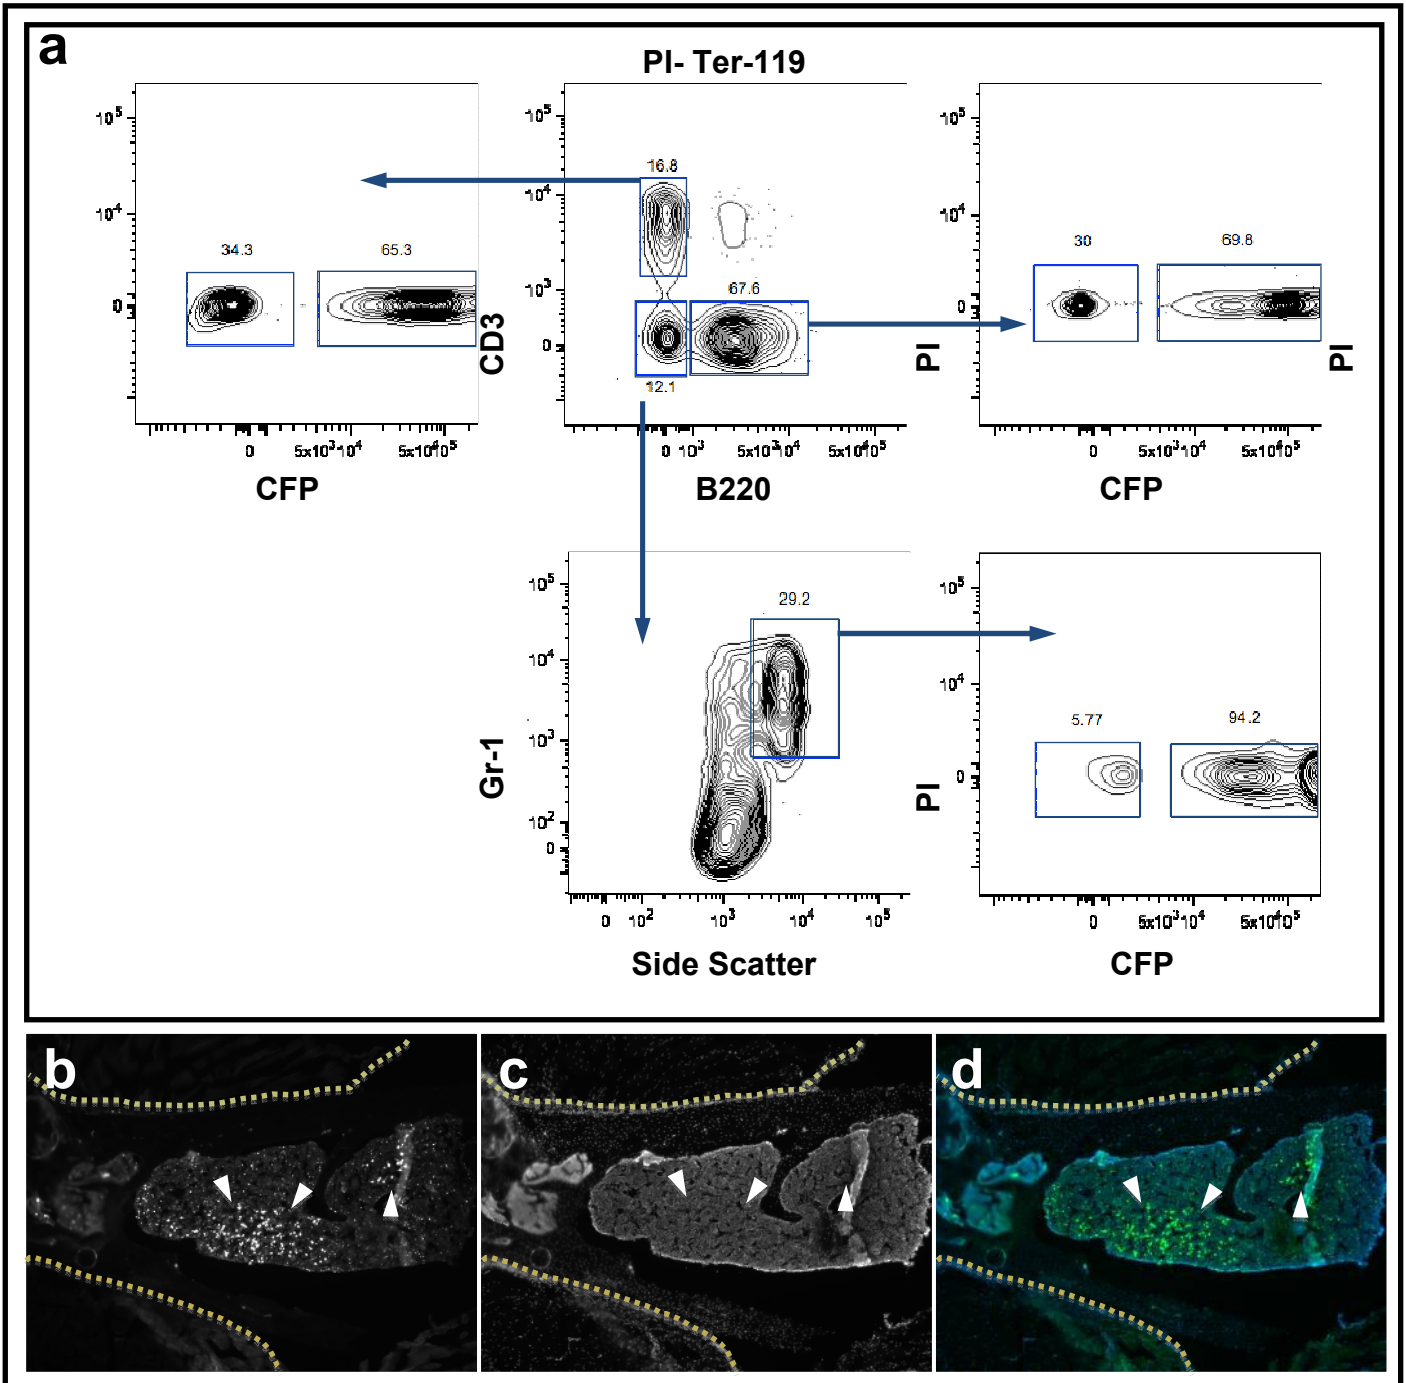



### **Supplementary Figure 7**

Flow chart showing blood chimerism after transplantation of genetically marked HSCs  
(**a**). Section through the tibia of host mice showing donor derived CFP blood cells occupying the marrow cavity (**b-d**, white arrowheads). Dotted lines outline the borders of the tibia.

**Supplementary table 1**

| amputation plane (AP) | no regrowth | partial regrowth | complete regrowth |
|-----------------------|-------------|------------------|-------------------|
| AP-1                  | 1/56        | 17/56            | 38/56             |
| AP-2                  | 24/54       | 18/54            | 12/54             |
| AP-3                  | 15/15       | 0/15             | 0/15              |

Planes of amputation included the distal one third of the digit (AP-1), distal half (AP-2) or distal two-thirds to entire digit (AP-3). Regrowth of tissues was examined after 3 months from operations.
